# Supplementary material for: Changes in older persons’ lifestyle and perceived health over time and during the COVID-19 pandemic: findings from the extended follow-up of the FINGER randomized controlled trial from 2009 to 2020
Source: Springer Nature journal article supplement (doi:10.1186/s12877-025-05979-6), 2025-05-03
Supplement: MOESM1 [file 12877_2025_5979_MOESM1_ESM.pdf]

**Supplementary table 1.** Crude values of lifestyle variables in the entire cohort (intervention and control groups combined) throughout the follow-up period. N-values include those who were included into the analysis (those who had responded to the questionnaire including the analysed lifestyle variables).

|                                                            | Baseline<br>(N=1259 <sup>1</sup> ) | 1st year<br>(N=1166 <sup>2</sup> ) | 2nd year<br>(N=1118 <sup>3</sup> ) | 5th year<br>(N=934 <sup>4</sup> ) | 7th year<br>(N=813 <sup>5</sup> ) | Pandemic<br>(N=735 <sup>6</sup> ) |
|------------------------------------------------------------|------------------------------------|------------------------------------|------------------------------------|-----------------------------------|-----------------------------------|-----------------------------------|
| <b>Cognitive activity</b><br>(times per week,<br>mean, SD) | 11.8 (5.0)                         | 12.3 (5.5)                         | 12.3 (5.2)                         | 12.3 (5.3)                        | 12.0 (5.4)                        | 12.5 (6.0)                        |
| <b>Social activity</b> (times<br>per week, mean, SD)       | 2.3 (2.8)                          | 2.5 (2.9)                          | 2.6 (3.0)                          | 2.3 (2.7)                         | 2.2 (2.7)                         | 1.5 (2.4)                         |
| <b>Physical activity, n (%)</b> <sup>7</sup>               |                                    |                                    |                                    |                                   |                                   |                                   |
| Once a week or less                                        | 315 (26.3%)                        | 267 (24.0%)                        | 251 (23.6%)                        | 241 (28.6%)                       | 224 (31.3%)                       | 104 (15.6%)                       |
| 2 times per week                                           | 200 (16.7%)                        | 174 (15.6%)                        | 193 (18.1%)                        | 149 (17.7%)                       | 121 (16.9%)                       | 88 (13.2%)                        |
| 3 times per week                                           | 287 (24.0%)                        | 278 (25.0%)                        | 259 (24.3%)                        | 184 (21.8%)                       | 147 (20.6%)                       | 115 (17.2%)                       |
| 4 times per week or<br>more                                | 395 (33.0%)                        | 393 (35.3%)                        | 362 (34.0%)                        | 270 (32.0%)                       | 223 (31.2%)                       | 361 (54.0%)                       |
| <b>Smokers, n (%)</b>                                      | 114 (9.4%)                         | 97 (8.4%)                          | 87 (7.8%)                          | 50 (5.5%)                         | 41 (5.1%)                         | 31 (4.2%)                         |
| <b>Alcohol use, n (%)</b> <sup>7</sup>                     |                                    |                                    |                                    |                                   |                                   |                                   |
| Less than monthly                                          | 438 (35.0%)                        | 439 (37.7%)                        | 421 (37.8%)                        | 364 (40.1%)                       | 364 (45.0%)                       | 377 (51.9%)                       |
| Once or twice per<br>month                                 | 257 (20.5%)                        | 228 (19.6%)                        | 216 (19.4%)                        | 202 (22.2%)                       | 157 (19.4%)                       | 127 (17.5%)                       |
| Once a week or more                                        | 462 (36.9%)                        | 422 (36.3%)                        | 408 (36.7%)                        | 292 (32.2%)                       | 245 (30.3%)                       | 203 (27.9%)                       |
| Daily                                                      | 94 (7.5%)                          | 75 (6.4%)                          | 68 (6.1%)                          | 50 (5.5%)                         | 42 (5.2%)                         | 19 (2.6%)                         |
| <b>Binge drinking, n (%)</b> <sup>7</sup>                  |                                    |                                    |                                    |                                   |                                   |                                   |
| Never                                                      | 701 (59.5%)                        | 683 (62.7%)                        | 669 (63.6%)                        | 590 (68.4%)                       | 562 (72.0%)                       | 337 (63.1%)                       |
| Less than once per<br>month                                | 322 (27.3%)                        | 291 (26.7%)                        | 279 (26.5%)                        | 196 (22.7%)                       | 167 (21.4%)                       | 141 (26.4%)                       |
| At least once per<br>month                                 | 93 (7.9%)                          | 69 (6.3%)                          | 68 (6.5%)                          | 44 (5.1%)                         | 30 (3.8%)                         | 37 (6.9%)                         |
| At least once per week                                     | 62 (5.3%)                          | 47 (4.3%)                          | 36 (3.4%)                          | 33 (3.8%)                         | 22 (2.8%)                         | 19 (3.6%)                         |
| <b>Fish</b> (portions per<br>week, mean, SD)               | 1.7 (1.1)                          | 1.8 (1.5)                          | 1.9 (2.1)                          | 1.9 (1.2)                         | 1.9 (1.2)                         | N/A                               |
| <b>Fruits and berries, n<br/>(%)</b> <sup>7</sup>          |                                    |                                    |                                    |                                   |                                   |                                   |
| Less than 3 portions<br>per week                           | 220 (17.5%)                        | 178 (15.3%)                        | 202 (18.1%)                        | 130 (14.2%)                       | 130 (16.0%)                       | N/A                               |
| 4-6 portions per week                                      | 225 (17.9%)                        | 210 (18.1%)                        | 189 (17.0%)                        | 160 (17.4%)                       | 126 (15.6%)                       | N/A                               |
| 1-2 portions per day                                       | 616 (49.0%)                        | 574 (49.4%)                        | 538 (48.3%)                        | 451 (49.1%)                       | 415 (51.2%)                       | N/A                               |
| 3 or more portions per<br>day                              | 196 (15.6%)                        | 199 (17.1%)                        | 186 (16.7%)                        | 177 (19.3%)                       | 139 (17.2%)                       | N/A                               |
| <b>Vegetables and roots,<br/>n (%)</b> <sup>7</sup>        |                                    |                                    |                                    |                                   |                                   |                                   |
| Less than 3 portions<br>per week                           | 227 (18.1%)                        | 175 (16.4%)                        | 180 (17.2%)                        | 157 (17.1%)                       | 144 (17.8%)                       | N/A                               |
| 4-6 portions per week                                      | 254 (20.2%)                        | 224 (21.0%)                        | 207 (19.8%)                        | 180 (19.6%)                       | 139 (17.2%)                       | N/A                               |
| 1-2 portions per day                                       | 604 (48.1%)                        | 497 (46.6%)                        | 493 (47.2%)                        | 454 (49.5%)                       | 392 (48.5%)                       | N/A                               |
| 3 or more portions per<br>day                              | 171 (13.6%)                        | 170 (15.9%)                        | 165 (15.8%)                        | 126 (13.7%)                       | 134 (16.6%)                       | N/A                               |

|                                                 |             |             |             |             |             |             |
|-------------------------------------------------|-------------|-------------|-------------|-------------|-------------|-------------|
| <b>Self-evaluated health, n (%)<sup>7</sup></b> |             |             |             |             |             |             |
| Poor or very poor                               | 43 (3.4%)   | 49 (4.2%)   | 46 (4.1%)   | 52 (5.7%)   | 73 (9.1%)   | 103 (14.3%) |
| Intermediate                                    | 459 (36.7%) | 360 (30.9%) | 330 (29.7%) | 342 (37.5%) | 313 (38.9%) | 280 (38.8%) |
| Good or very good                               | 750 (59.9%) | 756 (64.9%) | 735 (66.2%) | 517 (56.8%) | 418 (52.0%) | 339 (47.0%) |
| <b>Self-evaluated memory, n (%)<sup>7</sup></b> |             |             |             |             |             |             |
| Poor or very poor                               | 70 (5.6%)   | 49 (4.2%)   | 48 (4.3%)   | 69 (7.7%)   | 66 (8.2%)   | 83 (11.6%)  |
| Intermediate                                    | 591 (47.0%) | 501 (43.2%) | 436 (39.4%) | 391 (43.4%) | 362 (45.1%) | 317 (44.3%) |
| Good or very good                               | 596 (47.4%) | 611 (52.6%) | 624 (56.3%) | 441 (48.9%) | 374 (46.6%) | 315 (44.1%) |

<sup>1</sup>Number of participants providing data for each lifestyle factor vary between 1178-1257.

<sup>2</sup>Number of participants providing data for each lifestyle factor vary between 1066-1166.

<sup>3</sup>Number of participants providing data for each lifestyle factor vary between 1045-1118.

<sup>4</sup>Number of participants providing data for each lifestyle factor vary between 844-918.

<sup>5</sup>Number of participants providing data for each lifestyle factor vary between 715-811.

<sup>6</sup>Number of participants providing data for each lifestyle factor vary between 534-731.

<sup>7</sup>Categories of the original question have been combined to facilitate reading of the table (analyses conducted with the original categories).

N/A: not available.
